# Supplementary material for: Effects of elevated CO2 on predator avoidance behaviour by reef fishes is not altered by experimental test water
Source: PeerJ. 2016 Oct 6;4:e2501. doi: 10.7717/peerj.2501 (PMC5068342; doi:10.7717/peerj.2501)
Supplement: Data S1 [file peerj-04-2501-s002.xlsx]

## Sheet: Predator Cue
Replicate	cont-cont	control-high CO2	high CO2-control	high CO2-high CO2	High CO2+Gabazine
1	8.33333	0	12.5	50	4.16667
2	0	18.75	64.5833	81.25	6.25
3	18.75	0	70.8333	100	0
4	0	12.5	91.6667	50	20.8333
5	0	22.9167	79.1667	62.5	18.75
6	22.9167	0	100	85.4167	0
7	20.8333	10.4167	100	85.4167	2.08333
8	6.25	2.08333	77.0833	100	6.25
9	0	22.9167	72.9167	52.0833
10	18.75	25	72.9167	83.3333
11	0	0	93.75	100
12	2.08333	0	70.8333	68.75
13	14.5833	10.4167	66.6667	85.4167
14	29.1667		43.75	95.8333
15	2.08333		100	83.3333
16	0		83.3333	91.6667
Note: Logit transformation used for analysis: LN(y+e/1-y+e) where e=0.01 to account for proportions equal to 0 or 1.

## Sheet: Escapre Response
DAY	TREATMENT	TEST_WATER	NAME	TANK	DIST_STIM	DISTANCE	SPEED	MAX_SPEED	LATENCY	LOG10_LATENCY
1	CTL_TRTMT	CTL_TEST	Control.control	2	50	0.0193	0.6754	958.1	0.01904	-1.72033
1	CTL_TRTMT	CTL_TEST	Control.control	2	65	0.0159	0.5544	722.8	0.00952	-2.02136
1	CTL_TRTMT	CTL_TEST	Control.control	2	30	0.015	0.5257	1013.4	0.01428	-1.84527
1	CTL_TRTMT	CTL_TEST	Control.control	2	63	0.0195	0.6812	1170.4	0.02856	-1.54424
1	CTL_TRTMT	CTL_TEST	Control.control	2	41	0.016276	0.569882	913.1	0.02856	-1.54424
1	CTL_TRTMT	CTL_TEST	Control.control	2	42	0.02277	0.797244	1578.4	0.01428	-1.84527
1	CTL_TRTMT	CTL_TEST	Control.control	2	51	0.021666	0.758666	1025.7	0.01904	-1.72033
1	CTL_TRTMT	CTL_TEST	Control.control	11	57	0.021925	0.767725	1355	0.00952	-2.02136
1	CTL_TRTMT	CTL_TEST	Control.control	11	58	0.019806	0.693492	1188.4	0.01428	-1.84527
1	CTL_TRTMT	CTL_TEST	Control.control	11	29	0.021547	0.754427	1211.9	0.0119	-1.92445
1	CTL_TRTMT	CTL_TEST	Control.control	11	76	0.023477	0.821978	1203.1	0.0119	-1.92445
1	CTL_TRTMT	CTL_TEST	Control.control	11	87	0.01799	0.62992	1223.5	0.01428	-1.84527
1	CTL_TRTMT	CTL_TEST	Control.control	11	29	0.023946	0.838465	1194.3	0.01666	-1.77833
1	CTL_TRTMT	CTL_TEST	Control.control	11	39	0.016202	0.567315	797.2	0.03094	-1.50948
1	CTL_TRTMT	CO2_TEST	Control.co2	2	77	0.0167	0.5862	1374.1	0.0238	-1.62342
1	CTL_TRTMT	CO2_TEST	Control.co2	2	44	0.02	0.7022	1127.4	0.0119	-1.92445
1	CTL_TRTMT	CO2_TEST	Control.co2	2	49	0.0175	0.6126	929.7	0.0238	-1.62342
1	CTL_TRTMT	CO2_TEST	Control.co2	2	69	0.01246	0.4363	558	0.01666	-1.77833
1	CTL_TRTMT	CO2_TEST	Control.co2	2	50	0.0202	0.707	1127.4	0.01904	-1.72033
1	CTL_TRTMT	CO2_TEST	Control.co2	2	64	0.0167	0.5861	910.7	0.01428	-1.84527
1	CTL_TRTMT	CO2_TEST	Control.co2	11	27	0.019054	0.667144	1183.7	0.01666	-1.77833
1	CTL_TRTMT	CO2_TEST	Control.co2	11	60	0.021081	0.738137	1033.4	0.01666	-1.77833
1	CTL_TRTMT	CO2_TEST	Control.co2	11	40	0.023165	0.811118	1085.8	0.01666	-1.77833
1	CTL_TRTMT	CO2_TEST	Control.co2	11	41	0.02011	0.704125	1247.3	0.01428	-1.84527
1	CTL_TRTMT	CO2_TEST	Control.co2	11	65	0.019015	0.665733	916.7	0.01666	-1.77833
1	CTL_TRTMT	CO2_TEST	Control.co2	11	60	0.01955	0.684567	1105.2	0.0119	-1.92445
1	CTL_TRTMT	CO2_TEST	Control.co2	11	67	0.018459	0.646386	1179.4	0.0238	-1.62342
1	CO2_TRTMT	CO2_TEST	co2.co2	1	48	0.0217	0.7625	1176	0.03332	-1.4773
1	CO2_TRTMT	CO2_TEST	co2.co2	1	65	0.0153	0.5357	794.1	0.01904	-1.72033
1	CO2_TRTMT	CO2_TEST	co2.co2	1	33	0.0166	0.5812	820.4	0.0238	-1.62342
1	CO2_TRTMT	CO2_TEST	co2.co2	1	38	0.0201	0.7047	951.1	0.09044	-1.04364
1	CO2_TRTMT	CO2_TEST	co2.co2	1	60	0.0029	0.1034	197.3	0.01428	-1.84527
1	CO2_TRTMT	CO2_TEST	co2.co2	1	32	0.0191	0.6684	1045.3	0.02618	-1.58203
1	CO2_TRTMT	CO2_TEST	co2.co2	1	48	0.0136	0.4783	1149.7	NA	NA
1	CO2_TRTMT	CO2_TEST	co2.co2	12	69	0.007325	0.256518	538.9	0.01666	-1.77833
1	CO2_TRTMT	CO2_TEST	co2.co2	12	67	0.012383	0.433545	753.1	0.0238	-1.62342
1	CO2_TRTMT	CO2_TEST	co2.co2	12	56	0.019775	0.692404	950.3	0.01428	-1.84527
1	CO2_TRTMT	CO2_TEST	co2.co2	12	21	0.022861	0.800496	1150.4	0.0119	-1.92445
1	CO2_TRTMT	CO2_TEST	co2.co2	12	31	0.014381	0.503528	1062.4	0.01666	-1.77833
1	CO2_TRTMT	CTL_TEST	co2.control	1	75	0.0171	0.5971	942.6	0.02142	-1.66918
1	CO2_TRTMT	CTL_TEST	co2.control	1	58	0.018	0.6318	877.3	0.01904	-1.72033
1	CO2_TRTMT	CTL_TEST	co2.control	1	57	0.00763	0.2673	469.7	0.09282	-1.03236
1	CO2_TRTMT	CTL_TEST	co2.control	1	73	0.0093	0.3267	514.4	0.03332	-1.4773
1	CO2_TRTMT	CTL_TEST	co2.control	1	38	0.0207	0.7258	1229.4	0.01666	-1.77833
1	CO2_TRTMT	CTL_TEST	co2.control	1	50	0.0157	0.5503	1062.9	0.02618	-1.58203
1	CO2_TRTMT	CTL_TEST	co2.control	1	60	0.0157	0.5499	971.2	0.0119	-1.92445
1	CO2_TRTMT	CTL_TEST	co2.control	1	12	0.0201	0.7008	1514.9	0.01666	-1.77833
1	CO2_TRTMT	CTL_TEST	co2.control	12	76	0.020122	0.704584	1116.9	0.01428	-1.84527
1	CO2_TRTMT	CTL_TEST	co2.control	12	95	0.01808	0.633018	1128.3	0.01904	-1.72033
1	CO2_TRTMT	CTL_TEST	co2.control	12	79	0.017557	0.614742	1081.5	0.01666	-1.77833
1	CO2_TRTMT	CTL_TEST	co2.control	12	55	0.010706	0.374835	762.2	0.02618	-1.58203
1	CO2_TRTMT	CTL_TEST	co2.control	12	63	0.020907	0.732017	1194.3	0.01904	-1.72033
1	CO2_TRTMT	CTL_TEST	co2.control	12	25	0.020447	0.715961	983.3	0.0119	-1.92445
1	CO2_TRTMT	CTL_TEST	co2.control	12	71	0.024977	0.874572	1158.6	0.01904	-1.72033
2	CTL_TRTMT	CTL_TEST	Control.control	3	63	0.019121	0.669481	1254.06	0.01904	-1.72033
2	CTL_TRTMT	CTL_TEST	Control.control	3	42	0.021219	0.74301	1543.49	0.01904	-1.72033
2	CTL_TRTMT	CTL_TEST	Control.control	3	41	0.019747	0.691488	1129.96	0.01666	-1.77833
2	CTL_TRTMT	CTL_TEST	Control.control	3	25	0.021202	0.742407	1105.59	0.02142	-1.66918
2	CTL_TRTMT	CTL_TEST	Control.control	3	41	0.017401	0.609279	813.489	0.02142	-1.66918
2	CTL_TRTMT	CTL_TEST	Control.control	3	52	0.019425	0.680189	1032.77	0.0119	-1.92445
2	CTL_TRTMT	CTL_TEST	Control.control	3	36	0.020528	0.718843	954.411	0.00714	-2.1463
2	CTL_TRTMT	CTL_TEST	Control.control	14	102	0.019828	0.694228	1203.18	0.00952	-2.02136
2	CTL_TRTMT	CTL_TEST	Control.control	14	59	0.017748	0.621421	1062.95	0.02142	-1.66918
2	CTL_TRTMT	CTL_TEST	Control.control	14	67	0.017079	0.597992	979.992	0.02856	-1.54424
2	CTL_TRTMT	CTL_TEST	Control.control	14	80	0.026846	0.939943	1445.77	0.01904	-1.72033
2	CTL_TRTMT	CTL_TEST	Control.control	14	64	0.018636	0.652516	1105.29	0.01428	-1.84527
2	CTL_TRTMT	CO2_TEST	Control.co2	3	85	0.018548	0.649502	1268.36	0.01666	-1.77833
2	CTL_TRTMT	CO2_TEST	Control.co2	3	42	0.025858	0.905427	1328.69	0.01904	-1.72033
2	CTL_TRTMT	CO2_TEST	Control.co2	3	50	0.014301	0.500716	840.336	0.0119	-1.92445
2	CTL_TRTMT	CO2_TEST	Control.co2	3	67	0.024813	0.868767	1333.14	0.00952	-2.02136
2	CTL_TRTMT	CO2_TEST	Control.co2	3	70	0.016815	0.588783	1116.1	0.02142	-1.66918
2	CTL_TRTMT	CO2_TEST	Control.co2	3	50	0.021134	0.739992	921.204	0.01666	-1.77833
2	CTL_TRTMT	CO2_TEST	Control.co2	3	32	0.018674	0.653883	1177.21	0.01904	-1.72033
2	CTL_TRTMT	CO2_TEST	Control.co2	14	44	0.023924	0.837687	1257.28	0.01428	-1.84527
2	CTL_TRTMT	CO2_TEST	Control.co2	14	53	0.022273	0.779887	1050.03	0.0119	-1.92445
2	CTL_TRTMT	CO2_TEST	Control.co2	14	82	0.024913	0.872297	1178.7	0.01428	-1.84527
2	CTL_TRTMT	CO2_TEST	Control.co2	14	80	0.015751	0.551512	753.133	0.01904	-1.72033
2	CTL_TRTMT	CO2_TEST	Control.co2	14	44	0.017728	0.62065	833.47	0.02142	-1.66918
2	CTL_TRTMT	CO2_TEST	Control.co2	14	62	0.020671	0.723801	814.129	0.00952	-2.02136
2	CTL_TRTMT	CO2_TEST	Control.co2	14	59	0.023157	0.81079	1174.4	0.0119	-1.92445
2	CTL_TRTMT	CO2_TEST	Control.co2	14	67	0.0238	0.833401	1467.58	0.01428	-1.84527
2	CO2_TRTMT	CO2_TEST	co2.co2	4	37	0.014987	0.524745	998.268	0.0119	-1.92445
2	CO2_TRTMT	CO2_TEST	co2.co2	4	41	0.018804	0.658456	911.765	0.01666	-1.77833
2	CO2_TRTMT	CO2_TEST	co2.co2	4	66	0.02056	0.719873	986.098	0.1785	-0.748362
2	CO2_TRTMT	CO2_TEST	co2.co2	4	48	0.020531	0.718895	956.655	0.01428	-1.84527
2	CO2_TRTMT	CO2_TEST	co2.co2	4	57	0.019479	0.682074	1388.39	0.0119	-1.92445
2	CO2_TRTMT	CO2_TEST	co2.co2	4	44	0.018764	0.657055	797.213	0.01428	-1.84527
2	CO2_TRTMT	CO2_TEST	co2.co2	4	51	0.025037	0.876646	1188.41	0.02142	-1.66918
2	CO2_TRTMT	CO2_TEST	co2.co2	13	47	0.012227	0.428148	876.934	0.01428	-1.84527
2	CO2_TRTMT	CO2_TEST	co2.co2	13	14	0.023851	0.835071	996.176	0.0119	-1.92445
2	CO2_TRTMT	CO2_TEST	co2.co2	13	47	0.027034	0.646571	1203.18	0.02618	-1.58203
2	CO2_TRTMT	CO2_TEST	co2.co2	13	65	0.014683	0.51409	908.963	0.01428	-1.84527
2	CO2_TRTMT	CO2_TEST	co2.co2	13	67	0.025023	0.67621	1240.74	0.01428	-1.84527
2	CO2_TRTMT	CO2_TEST	co2.co2	13	31	0.018829	0.659292	1249.25	0.0119	-1.92445
2	CO2_TRTMT	CO2_TEST	co2.co2	13	46	0.013054	0.457099	774.752	0.01428	-1.84527
2	CO2_TRTMT	CTL_TEST	co2.control	13	73	0.022939	0.803233	1211.95	NA	NA
2	CO2_TRTMT	CTL_TEST	co2.control	4	80	0.022121	0.774452	1120.49	0.0476	-1.32239
2	CO2_TRTMT	CTL_TEST	co2.control	4	39	0.020262	0.709436	1022.35	0.03332	-1.4773
2	CO2_TRTMT	CTL_TEST	co2.control	4	40	0.012517	0.438286	757.352	0.02856	-1.54424
2	CO2_TRTMT	CTL_TEST	co2.control	4	58	0.021915	0.767329	1085.83	0.0476	-1.32239
2	CO2_TRTMT	CTL_TEST	co2.control	4	63	0.021777	0.762458	1215.96	0.00952	-2.02136
2	CO2_TRTMT	CTL_TEST	co2.control	13	71	0.019768	0.692117	999.859	0.01904	-1.72033
2	CO2_TRTMT	CTL_TEST	co2.control	13	73	0.00391	0.13691	381.127	0.06664	-1.17627
2	CO2_TRTMT	CTL_TEST	co2.control	13	17	0.01847	0.70552	882.353	0.01666	-1.77833
2	CO2_TRTMT	CTL_TEST	co2.control	13	43	0.018722	0.655524	910.399	0.02618	-1.58203
2	CO2_TRTMT	CTL_TEST	co2.control	13	79	0.020071	0.702811	983.3	0.0119	-1.92445
2	CO2_TRTMT	CTL_TEST	co2.control	13	32	0.016377	0.573425	620.086	0.02142	-1.66918
2	CO2_TRTMT	CTL_TEST	co2.control	13	38	0.022527	0.788766	1062.49	0.0119	-1.92445
